# Supplementary material for: The Efficacy of Utilizing Platelet-Rich Fibrin for Managing Periodontal Intrabony Defects in Conjunction with Graft Material: A Systematic Review and Meta-Analysis
Source: MDPI journal article supplement (doi:10.3390/app14083371), 2024-04-17
Supplement: s1 [file s1]

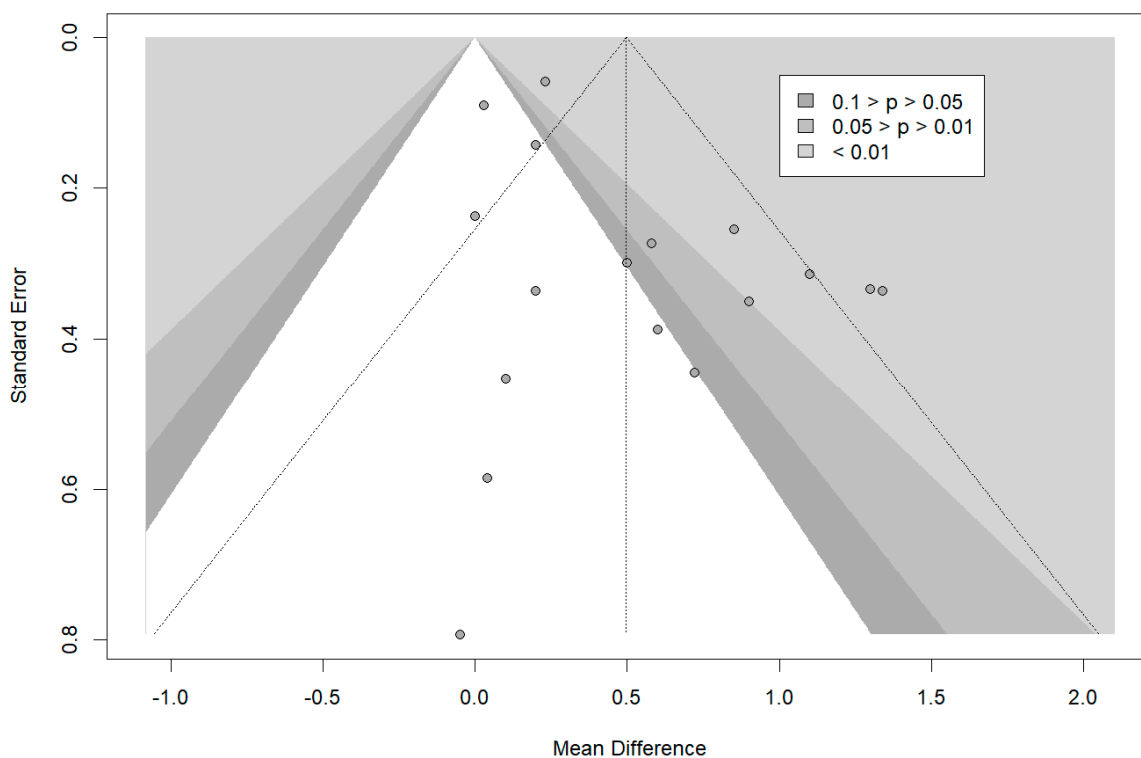

(A)

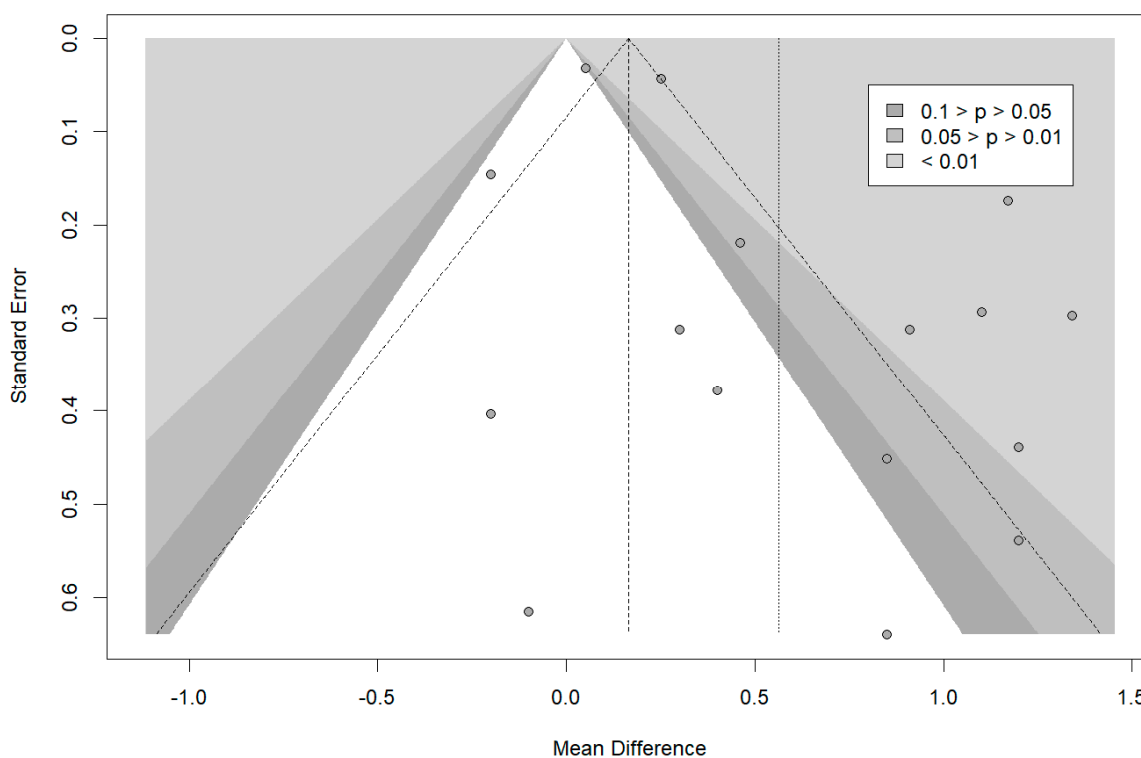

(B)

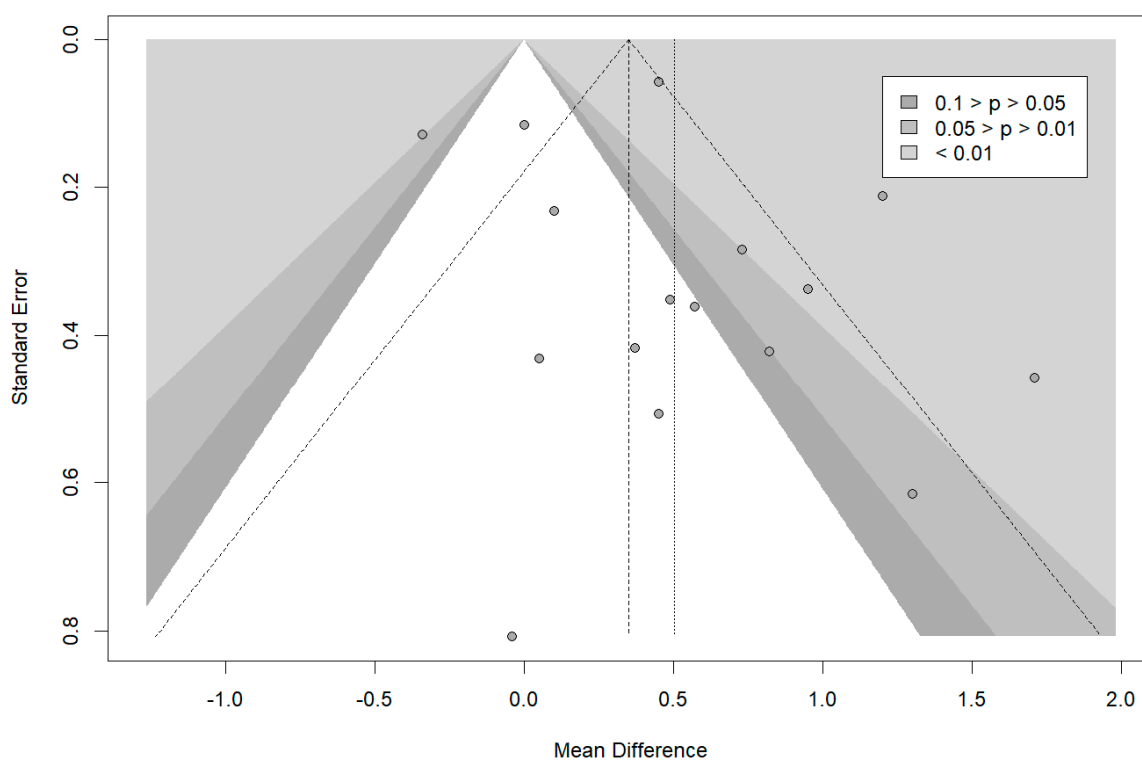

(C)

**Supplementary Figure S1.** Contour-enhanced funnel plots. (A) Periodontal probing depth. (B) Clinical attachment level. (C) Bone fill.

**Supplementary Table S1.** Search strategy of the online databases.

| DB                 | Search         | Search strategy                                                                                                                                                                                                                                                                                                                                                                                                                                                                                                                                                                                                                                         |
|--------------------|----------------|---------------------------------------------------------------------------------------------------------------------------------------------------------------------------------------------------------------------------------------------------------------------------------------------------------------------------------------------------------------------------------------------------------------------------------------------------------------------------------------------------------------------------------------------------------------------------------------------------------------------------------------------------------|
| Medline via Pubmed | #1             | "periodontal intrabony defects"[TW] OR "intrabony periodontal defects"[TW] OR "intrabony defect"[TW] OR "bone defect"[TW] OR "periodontal osseous defect"[TW]                                                                                                                                                                                                                                                                                                                                                                                                                                                                                           |
|                    | #2             | "Periodontitis"[Mesh]                                                                                                                                                                                                                                                                                                                                                                                                                                                                                                                                                                                                                                   |
|                    | #3             | "Periodontitis"[TW] OR "Periodontitides"[TW] OR "Pericementitis"[TW] OR "Pericementitides"[TW]                                                                                                                                                                                                                                                                                                                                                                                                                                                                                                                                                          |
|                    | #4             | "Chronic Periodontitis"[Mesh]                                                                                                                                                                                                                                                                                                                                                                                                                                                                                                                                                                                                                           |
|                    | #5             | "Chronic Periodontitis"[TW] OR "Chronic Periodontitides"[TW] OR "Periodontitides, Chronic"[TW] OR "Periodontitis, Adult"[TW] OR "Periodontitis, Chronic"[TW] OR "Adult Periodontitis"[TW] OR "Adult Periodontitides"[TW] OR "Periodontitides, Adult"[TW]                                                                                                                                                                                                                                                                                                                                                                                                |
|                    | #6             | "Alveolar Bone Loss"[Mesh]                                                                                                                                                                                                                                                                                                                                                                                                                                                                                                                                                                                                                              |
|                    | #7             | "Alveolar Bone Loss"[TW] OR "Alveolar Bone Losses"[TW] OR "Alveolar Process Atrophy"[TW] OR "Alveolar Process Atrophies"[TW] OR "Alveolar Resorption"[TW] OR "Alveolar Resorptions"[TW] OR "Resorption, Alveolar"[TW] OR "Resorptions, Alveolar"[TW] OR "Bone Loss, Periodontal"[TW] OR "Bone Losses, Periodontal"[TW] OR "Periodontal Bone Losses"[TW] OR "Periodontal Bone Loss"[TW] OR "Periodontal Resorption"[TW] OR "Periodontal Resorptions"[TW] OR "Resorption, Periodontal"[TW] OR "Alveolar Bone Atrophy"[TW] OR "Alveolar Bone Atrophies"[TW] OR "Bone Atrophies, Alveolar"[TW] OR "Bone Atrophy, Alveolar"[TW] OR "Bone Loss, Alveolar"[TW] |
|                    | #8<br>Combine  | #1 OR #2 OR #3 OR #4 OR #5 OR #6 OR #7                                                                                                                                                                                                                                                                                                                                                                                                                                                                                                                                                                                                                  |
|                    | #9             | "Platelet-Rich Fibrin"[Mesh]                                                                                                                                                                                                                                                                                                                                                                                                                                                                                                                                                                                                                            |
|                    | #10            | "Platelet-Rich Fibrin"[TW] OR "Fibrin, Platelet-Rich"[TW] OR "Platelet Rich Fibrin"[TW] OR "L-PRF"[TW] OR "Leukocyte- and Platelet-Rich Fibrin"[TW] OR "Leukocyte and Platelet Rich Fibrin"[TW] OR "PRF"[TW] OR "autologous platelet rich concentrates"[TW]                                                                                                                                                                                                                                                                                                                                                                                             |
|                    | #11<br>Combine | #9 OR #10                                                                                                                                                                                                                                                                                                                                                                                                                                                                                                                                                                                                                                               |
|                    | #12<br>Combine | #8 AND #11                                                                                                                                                                                                                                                                                                                                                                                                                                                                                                                                                                                                                                              |
|                    | #13<br>Limit   | #12 AND (randomizedcontrolledtrial[Filter])                                                                                                                                                                                                                                                                                                                                                                                                                                                                                                                                                                                                             |
|                    | #14<br>Limit   | #13 AND (alladult[Filter])                                                                                                                                                                                                                                                                                                                                                                                                                                                                                                                                                                                                                              |
|                    | #15<br>Limit   | #14 NOT ("animals"[MeSH] NOT "Humans"[MeSH])                                                                                                                                                                                                                                                                                                                                                                                                                                                                                                                                                                                                            |

|                             |                        |                                                                                                                                                                                                                                                                                                                                                                                                                                                                                                                                                                                                                                                                                                                                                                                                                         |
|-----------------------------|------------------------|-------------------------------------------------------------------------------------------------------------------------------------------------------------------------------------------------------------------------------------------------------------------------------------------------------------------------------------------------------------------------------------------------------------------------------------------------------------------------------------------------------------------------------------------------------------------------------------------------------------------------------------------------------------------------------------------------------------------------------------------------------------------------------------------------------------------------|
| <b>Embase</b>               | #1                     | "periodontal intrabony defects":ti,ab,kw,de OR "intrabony periodontal defects":ti,ab,kw,de OR "intrabony defect":ti,ab,kw,de OR "bone defect":ti,ab,kw,de OR "periodontal osseous defect":ti,ab,kw,de                                                                                                                                                                                                                                                                                                                                                                                                                                                                                                                                                                                                                   |
|                             | #2                     | "periodontitis"/exp                                                                                                                                                                                                                                                                                                                                                                                                                                                                                                                                                                                                                                                                                                                                                                                                     |
|                             | #3                     | "Periodontitis":ti,ab,kw,de OR "Periodontitides":ti,ab,kw,de OR "Pericementitis":ti,ab,kw,de OR "Pericementitides":ti,ab,kw,de                                                                                                                                                                                                                                                                                                                                                                                                                                                                                                                                                                                                                                                                                          |
|                             | #4                     | "chronic periodontitis"/exp                                                                                                                                                                                                                                                                                                                                                                                                                                                                                                                                                                                                                                                                                                                                                                                             |
|                             | #5                     | "Chronic Periodontitis":ti,ab,kw,de OR "Chronic Periodontitides":ti,ab,kw,de OR "Periodontitides, Chronic":ti,ab,kw,de OR "Periodontitis, Adult":ti,ab,kw,de OR "Periodontitis, Chronic":ti,ab,kw,de OR "Adult Periodontitis":ti,ab,kw,de OR "Adult Periodontitides":ti,ab,kw,de OR "Periodontitides, Adult":ti,ab,kw,de                                                                                                                                                                                                                                                                                                                                                                                                                                                                                                |
|                             | #6                     | "alveolar bone loss"/exp                                                                                                                                                                                                                                                                                                                                                                                                                                                                                                                                                                                                                                                                                                                                                                                                |
|                             | #7                     | "Alveolar Bone Loss":ti,ab,kw,de OR "Alveolar Bone Losses":ti,ab,kw,de OR "Alveolar Process Atrophy":ti,ab,kw,de OR "Alveolar Process Atrophies":ti,ab,kw,de OR "Alveolar Resorption":ti,ab,kw,de OR "Alveolar Resorptions":ti,ab,kw,de OR "Resorption, Alveolar":ti,ab,kw,de OR "Resorptions, Alveolar":ti,ab,kw,de OR "Bone Loss, Periodontal":ti,ab,kw,de OR "Bone Losses, Periodontal":ti,ab,kw,de OR "Periodontal Bone Losses":ti,ab,kw,de OR "Periodontal Bone Loss":ti,ab,kw,de OR "Periodontal Resorption":ti,ab,kw,de OR "Periodontal Resorptions":ti,ab,kw,de OR "Resorption, Periodontal":ti,ab,kw,de OR "Alveolar Bone Atrophy":ti,ab,kw,de OR "Alveolar Bone Atrophies":ti,ab,kw,de OR "Bone Atrophies, Alveolar":ti,ab,kw,de OR "Bone Atrophy, Alveolar":ti,ab,kw,de OR "Bone Loss, Alveolar":ti,ab,kw,de |
|                             | <b>#8<br/>Combine</b>  | <b>#1 OR #2 OR #3 OR #4 OR #5 OR #6 OR #7</b>                                                                                                                                                                                                                                                                                                                                                                                                                                                                                                                                                                                                                                                                                                                                                                           |
|                             | #9                     | "platelet-rich fibrin"/exp                                                                                                                                                                                                                                                                                                                                                                                                                                                                                                                                                                                                                                                                                                                                                                                              |
|                             | #10                    | "Platelet-Rich Fibrin":ti,ab,kw,de OR "Fibrin, Platelet-Rich":ti,ab,kw,de OR "Platelet Rich Fibrin":ti,ab,kw,de OR "L-PRF":ti,ab,kw,de OR "Leukocyte- and Platelet-Rich Fibrin":ti,ab,kw,de OR "Leukocyte and Platelet Rich Fibrin":ti,ab,kw,de OR "PRF":ti,ab,kw,de OR "autologous platelet rich concentrates":ti,ab,kw,de                                                                                                                                                                                                                                                                                                                                                                                                                                                                                             |
|                             | <b>#11<br/>Combine</b> | <b>#9 OR #10</b>                                                                                                                                                                                                                                                                                                                                                                                                                                                                                                                                                                                                                                                                                                                                                                                                        |
|                             | <b>#12<br/>Combine</b> | <b>#8 AND #11</b>                                                                                                                                                                                                                                                                                                                                                                                                                                                                                                                                                                                                                                                                                                                                                                                                       |
| <b>Cochrane<br/>Library</b> | #1                     | "periodontal intrabony defects":ti,ab,kw OR "intrabony periodontal defects":ti,ab,kw OR "intrabony defect":ti,ab,kw OR "bone defect":ti,ab,kw OR "periodontal osseous defect":ti,ab,kw                                                                                                                                                                                                                                                                                                                                                                                                                                                                                                                                                                                                                                  |
|                             | #2                     | [mh "Periodontitis"]                                                                                                                                                                                                                                                                                                                                                                                                                                                                                                                                                                                                                                                                                                                                                                                                    |
|                             | #3                     | "Periodontitis":ti,ab,kw OR "Periodontitides":ti,ab,kw OR "Pericementitis":ti,ab,kw OR "Pericementitides":ti,ab,kw                                                                                                                                                                                                                                                                                                                                                                                                                                                                                                                                                                                                                                                                                                      |

|                    |                |                                                                                                                                                                                                                                                                                                                                                                                                                                                                                                                                                                                                                                                                                                                                                             |
|--------------------|----------------|-------------------------------------------------------------------------------------------------------------------------------------------------------------------------------------------------------------------------------------------------------------------------------------------------------------------------------------------------------------------------------------------------------------------------------------------------------------------------------------------------------------------------------------------------------------------------------------------------------------------------------------------------------------------------------------------------------------------------------------------------------------|
|                    | #4             | [mh "Chronic Periodontitis"]                                                                                                                                                                                                                                                                                                                                                                                                                                                                                                                                                                                                                                                                                                                                |
|                    | #5             | "Chronic Periodontitis":ti,ab,kw OR "Chronic Periodontitides":ti,ab,kw OR "Periodontitides, Chronic":ti,ab,kw OR "Periodontitis, Adult":ti,ab,kw OR "Periodontitis, Chronic":ti,ab,kw OR "Adult Periodontitis":ti,ab,kw OR "Adult Periodontitides":ti,ab,kw OR "Periodontitides, Adult":ti,ab,kw                                                                                                                                                                                                                                                                                                                                                                                                                                                            |
|                    | #6             | [mh "Alveolar Bone Loss"]                                                                                                                                                                                                                                                                                                                                                                                                                                                                                                                                                                                                                                                                                                                                   |
|                    | #7             | "Alveolar Bone Loss":ti,ab,kw OR "Alveolar Bone Losses":ti,ab,kw OR "Alveolar Process Atrophy":ti,ab,kw OR "Alveolar Process Atrophies":ti,ab,kw OR "Alveolar Resorption":ti,ab,kw OR "Alveolar Resorptions":ti,ab,kw OR "Resorption, Alveolar":ti,ab,kw OR "Resorptions, Alveolar":ti,ab,kw OR "Bone Loss, Periodontal":ti,ab,kw OR "Bone Losses, Periodontal":ti,ab,kw OR "Periodontal Bone Losses":ti,ab,kw OR "Periodontal Bone Loss":ti,ab,kw OR "Periodontal Resorption":ti,ab,kw OR "Periodontal Resorptions":ti,ab,kw OR "Resorption, Periodontal":ti,ab,kw OR "Alveolar Bone Atrophy":ti,ab,kw OR "Alveolar Bone Atrophies":ti,ab,kw OR "Bone Atrophies, Alveolar":ti,ab,kw OR "Bone Atrophy, Alveolar":ti,ab,kw OR "Bone Loss, Alveolar":ti,ab,kw |
|                    | #8<br>Combine  | #1 OR #2 OR #3 OR #4 OR #5 OR #6 OR #7                                                                                                                                                                                                                                                                                                                                                                                                                                                                                                                                                                                                                                                                                                                      |
|                    | #9             | [mh "Platelet-Rich Fibrin"]                                                                                                                                                                                                                                                                                                                                                                                                                                                                                                                                                                                                                                                                                                                                 |
|                    | #10            | "Platelet-Rich Fibrin":ti,ab,kw OR "Fibrin, Platelet-Rich":ti,ab,kw OR "Platelet Rich Fibrin":ti,ab,kw OR "L-PRF":ti,ab,kw OR "Leukocyte- and Platelet-Rich Fibrin":ti,ab,kw OR "Leukocyte and Platelet Rich Fibrin":ti,ab,kw OR "PRF":ti,ab,kw OR "autologous platelet rich concentrates":ti,ab,kw                                                                                                                                                                                                                                                                                                                                                                                                                                                         |
|                    | #11<br>Combine | #9 OR #10                                                                                                                                                                                                                                                                                                                                                                                                                                                                                                                                                                                                                                                                                                                                                   |
|                    | #12<br>Combine | #8 AND #11                                                                                                                                                                                                                                                                                                                                                                                                                                                                                                                                                                                                                                                                                                                                                  |
|                    | #13            | Cochrane Reviews / Trials                                                                                                                                                                                                                                                                                                                                                                                                                                                                                                                                                                                                                                                                                                                                   |
| ClinicalTrials.gov | #1             | Condition or disease: "periodontitis"<br>Other terms: "with results"<br>Intervention/Treatment: "PRF" OR "platelet" OR "leukocyte"                                                                                                                                                                                                                                                                                                                                                                                                                                                                                                                                                                                                                          |

**Supplementary Table S2.** Excluded studies from full-text reading.

| Reasons for exclusion                                     | References                                                                                                                                                                                                                                                                                                                                                                                                                                                                                                                                                                                                                                                                                                                                                                                                                                                                                                                                                                                        |
|-----------------------------------------------------------|---------------------------------------------------------------------------------------------------------------------------------------------------------------------------------------------------------------------------------------------------------------------------------------------------------------------------------------------------------------------------------------------------------------------------------------------------------------------------------------------------------------------------------------------------------------------------------------------------------------------------------------------------------------------------------------------------------------------------------------------------------------------------------------------------------------------------------------------------------------------------------------------------------------------------------------------------------------------------------------------------|
| <b>Insufficient data [63–65]</b>                          | <ol style="list-style-type: none"> <li data-bbox="384 394 1522 510">1. Liu K, Huang Z, Chen Z, Han B, Ouyang X. Treatment of periodontal intrabony defects using bovine porous bone mineral and guided tissue regeneration with/without platelet-rich fibrin: A randomized controlled clinical trial. <i>J Periodontol</i>. 2021;92(11):1546–53.</li> <li data-bbox="384 521 1522 683">2. Agrawal I, Chandran S, Nadig P. Comparative Evaluation of the Efficacy of Platelet-rich Fibrin and Calcium Phosphosilicate Putty alone and in Combination in the Treatment of Intrabony Defects: A Randomized Clinical and Radiographic Study. <i>Contemp Clin Dent</i>. 2017;8(2):205–10.</li> <li data-bbox="384 694 1522 824">3. Mlachkova A, Dosseva-Panova V, Ivanov I, Parvanov D, Maynalovska H. Application of platelet rich fibrin in surgical periodontal therapy: A controlled clinical trial. <i>Journal of IMAB – Annual Proceeding (Scientific Papers)</i>. 2022;28(4):4634–9.</li> </ol> |
| <b>Outcome measured at different time points [66, 67]</b> | <ol style="list-style-type: none"> <li data-bbox="384 857 1522 974">1. Chaudhary B, Singh R, Manjunath RGS, Subramanyam SKS. Injectable platelet-rich fibrin polymerized with hydroxyapatite bone graft for the treatment of three-wall intrabony defects: A randomized control clinical trial. <i>J Indian Soc Periodontol</i>. 2023;27(2):174–9.</li> <li data-bbox="384 985 1522 1102">2. Agarwal A, Gupta ND, Jain A. Platelet rich fibrin combined with decalcified freeze-dried bone allograft for the treatment of human intrabony periodontal defects: a randomized split mouth clinical trial. <i>Acta Odontol Scand</i>. 2016;74(1):36–43.</li> </ol>                                                                                                                                                                                                                                                                                                                                   |

Supplementary Table S3. Risk of bias.

| Study        | D1:<br>Randomization<br>process                                                       | D2:<br>Deviations from the intended interventions                                  | D3:<br>Missing outcome data                    | D4:<br>Measurement of the outcome                                                                                                                                                                                                                                                                                                                | D5:<br>Selection of the reported result                                                                                                       |
|--------------|---------------------------------------------------------------------------------------|------------------------------------------------------------------------------------|------------------------------------------------|--------------------------------------------------------------------------------------------------------------------------------------------------------------------------------------------------------------------------------------------------------------------------------------------------------------------------------------------------|-----------------------------------------------------------------------------------------------------------------------------------------------|
| Bansal 2013  | <b>Low risk:</b><br>“Selected sites were randomly divided into two groups.”(Page 362) | <b>Low risk:</b><br>No deviation From the Intended intervention has been reported. | <b>Low risk:</b><br>No dropouts were reported. | <b>Low risk:</b><br>“Probing pocket depth, gingival marginal position and clinical attachment level of the selected sites were recorded using customized acrylic occlusal stents at baseline before surgery”(Page 362)<br>“Radiographic measurements were taken using a vernier caliper to achieve accuracy of 1/10 mm in measurement”(Page 363) | <b>Some concerns:</b><br>No information on whether the research results were analyzed before the unblinding of the intervention outcome data. |
| Elgendy 2015 | <b>Low risk:</b><br>“Selected sites were randomly divided into two groups.”(Page 62)  | <b>Low risk:</b><br>No deviation From the Intended intervention has been reported. | <b>Low risk:</b><br>No dropouts were reported. | <b>Low risk:</b><br>“The region of interest was determined in each radiograph as the region that begins 1 mm below the cement-enamel junction and down toward the root apex 7 mm in length. The gray levels were carried out using the computer graphic software Adobe Photoshop version                                                         | <b>Some concerns:</b><br>No information on whether the research results were analyzed before the unblinding of the intervention outcome data. |

|            |                                                                                                                                                                      |                                                                                    |                                                |                                                                                                                                                                                                                                                                                                                                   |                                                                                                                                                                      |
|------------|----------------------------------------------------------------------------------------------------------------------------------------------------------------------|------------------------------------------------------------------------------------|------------------------------------------------|-----------------------------------------------------------------------------------------------------------------------------------------------------------------------------------------------------------------------------------------------------------------------------------------------------------------------------------|----------------------------------------------------------------------------------------------------------------------------------------------------------------------|
|            |                                                                                                                                                                      |                                                                                    |                                                | on 7 (Adobe Systems Incorporated, 345 Park Avenue, San Jose, California 95110, USA).”(Page 62)                                                                                                                                                                                                                                    |                                                                                                                                                                      |
| Gamal 2016 | <b>Low risk:</b><br>“Patients were randomly assigned to one of three groups, masked with respect to assignment, each containing 10 patients.”(Page 656)              | <b>Low risk:</b><br>No deviation From the Intended intervention has been reported. | <b>Low risk:</b><br>No dropouts were reported. | <b>Low risk:</b><br>“To take root length as a standardized reference at different intervals during follow-up periods, the intrabony component was measured by subtracting the distance between the CEJ and the root apex from the distance between the base of the defect and the root apex using appropriate software.”(Page 56) | <b>Low risk:</b><br>“Computer-assessed randomization was carried out using a commercially available computer software package immediately before surgery.”(Page 656) |
| Naqvi 2017 | <b>Low risk:</b><br>“The selected sites in each individual were randomly divided into control site and test site according to split mouth design technique.”(Page 9) | <b>Low risk:</b><br>No deviation From the Intended intervention has been reported. | <b>Low risk:</b><br>No dropouts were reported. | <b>Low risk:</b><br>“The difference in amount of bone level was calculated by standardized radiographic means using computer aided analysis.”(Page 30)                                                                                                                                                                            | <b>Some concerns:</b><br>No information on whether the research results were analyzed before the unblinding of the intervention outcome data.                        |



|              |                                                                                                                                                                                  |                                                                                          |                                                |                                                                                                                                                                                                                                                                                                    |                                                                                                                                |
|--------------|----------------------------------------------------------------------------------------------------------------------------------------------------------------------------------|------------------------------------------------------------------------------------------|------------------------------------------------|----------------------------------------------------------------------------------------------------------------------------------------------------------------------------------------------------------------------------------------------------------------------------------------------------|--------------------------------------------------------------------------------------------------------------------------------|
| Sezgin 2017  | <b>Low risk:</b><br>“The selected sites were randomly (coin toss) divided into control (ABBM alone) and test (ABBM-PRF) groups.”(Page 2)                                         | <b>Low risk:</b><br>No deviation<br>From the<br>Intended intervention has been reported. | <b>Low risk:</b><br>No dropouts were reported. | <b>Low risk:</b><br>“Two periodontists performed all surgeries. One examiner other than the surgeon performed all clinical measurements, and another examiner performed all radiographical measurements.”(Page 3)                                                                                  | <b>Low risk:</b><br>“Both examiners were blinded to the study groups.”(Page 3)                                                 |
| Aggour 2017  | <b>Low risk:</b><br>“Two different approaches to treat intrabony periodontal defects were compared by using a split-mouth, randomized, single-blind controlled design.”(Page 29) | <b>Low risk:</b><br>No deviation<br>From the<br>Intended intervention has been reported. | <b>Low risk:</b><br>No dropouts were reported. | <b>Low risk:</b><br>“By means of an image analysis program (PorDios, Institute of Orthodontic Computer Science Ltd., Aarhus, Denmark; Gotfredsen, 1999), the following parameters were estimated on the images.”(Page 30)                                                                          | <b>Low risk:</b><br>“One investigator who was blinded to the surgical procedures assessed the clinical measurements.”(Page 29) |
| Bodhare 2019 | <b>Low risk:</b><br>“The selected sites were assigned randomly (by flipping coin) to Group 1 or Group 2.”(Page 587)                                                              | <b>Low risk:</b><br>No deviation<br>From the<br>Intended intervention has been reported. | <b>Low risk:</b><br>No dropouts were reported. | <b>Low risk:</b><br>“In oblique view X, Y, and Z axes were sequentially analyzed to locate the most apical point of the BD or the most coronal aspect of the defect-associated AC. All clinical and radiographic measurements were made by single examiners (RK) and (GB) respectively.”(Page 585) | <b>Low risk:</b><br>“Both the examiners were blinded to the study groups.”(Page 585)                                           |

|                |                                                                                                                                                                                                                 |                                                                                            |                                                        |                                                                                                                                                                                                                                                                                 |                                                                                                                                                       |
|----------------|-----------------------------------------------------------------------------------------------------------------------------------------------------------------------------------------------------------------|--------------------------------------------------------------------------------------------|--------------------------------------------------------|---------------------------------------------------------------------------------------------------------------------------------------------------------------------------------------------------------------------------------------------------------------------------------|-------------------------------------------------------------------------------------------------------------------------------------------------------|
|                |                                                                                                                                                                                                                 |                                                                                            |                                                        | 587)                                                                                                                                                                                                                                                                            |                                                                                                                                                       |
| Saravanan 2019 | <p><b>Low risk:</b><br/>“This study was carried in 30 sites. The selected sites were randomly allocated to test and control groups.”(Page 111)</p>                                                              | <p><b>Low risk:</b><br/>No deviation From the Intended intervention has been reported.</p> | <p><b>Low risk:</b><br/>No dropouts were reported.</p> | <p><b>Low risk:</b><br/>“Alginate impressions were taken, casts were poured, and a stent was fabricated using acrylic. A groove was made to duplicate the placement of the probe at the end of the 6 months to minimize the errors in postoperative measurement.”(Page 111)</p> | <p><b>Some concerns:</b><br/>No information on whether the research results were analyzed before the unblinding of the intervention outcome data.</p> |
| Atchuta 2020   | <p><b>Low risk:</b><br/>“A total of 39 sites with intrabony defects in chronic periodontitis patients were randomly assigned into three groups, based on the treatment modality rendered to them.”(Page 61)</p> | <p><b>Low risk:</b><br/>No deviation From the Intended intervention has been reported.</p> | <p><b>Low risk:</b><br/>No dropouts were reported.</p> | <p><b>Low risk:</b><br/>“Measurements were done using special software (University of Texas Health Science Center at San Antonio [UTHSCSA] Image Tool)<sup>TM</sup> to evaluate the bone fill.”(Page 61)</p>                                                                    | <p><b>Some concerns:</b><br/>No information on whether the research results were analyzed before the unblinding of the intervention outcome data.</p> |

|               |                                                                                                                                                                                                                           |                                                                                    |                                                |                                                                                                                                                                                                                                                               |                                                                                                                                                                                                                                                                                                                  |
|---------------|---------------------------------------------------------------------------------------------------------------------------------------------------------------------------------------------------------------------------|------------------------------------------------------------------------------------|------------------------------------------------|---------------------------------------------------------------------------------------------------------------------------------------------------------------------------------------------------------------------------------------------------------------|------------------------------------------------------------------------------------------------------------------------------------------------------------------------------------------------------------------------------------------------------------------------------------------------------------------|
| Goyal 2020    | <b>Low risk:</b><br>“The selected patients were randomly allocated utilizing sequential numbered, opaque, and sealed envelopes to each treatment group just before the surgery by a noninvestigating examiner.”(Page 157) | <b>Low risk:</b><br>No deviation From the Intended intervention has been reported. | <b>Low risk:</b><br>No dropouts were reported. | <b>Low risk:</b><br>“Following image acquisition in three sections consisting of axial, sagittal, and coronal planes, as measured with the help of digital calipers, the images were reconstructed using the software provided with the CT system.”(Page 158) | <b>Low risk:</b><br>“The analyzed hard-tissue parameters included depth of bony defect, AC level, defect volume, and linear bone defect height and were recorded by another trained blind investigator who was not the part of study, whereas surgeries were performed by a single-trained clinician.”(Page 158) |
| Pavani 2021   | <b>Low risk:</b><br>“Treatment order followed was random and blinding of observer/examiner as well as statistician was done.”(Page 139)                                                                                   | <b>Low risk:</b><br>No deviation From the Intended intervention has been reported. | <b>Low risk:</b><br>No dropouts were reported. | <b>Low risk:</b><br>“Single observer performed all clinical measurements preoperatively as well as postoperatively without the knowledge of treatment groups.”(Page 139)                                                                                      | <b>Low risk:</b><br>“Treatment order followed was random and blinding of observer/examiner as well as statistician was done.”(Page 139)                                                                                                                                                                          |
| Bahammam 2021 | <b>Low risk:</b><br>“Process of randomization was used for assigning patients to different groups that were provided with different treatments.”(Page 871)                                                                | <b>Low risk:</b><br>No deviation From the Intended intervention has been reported. | <b>Low risk:</b><br>No dropouts were reported. | <b>Low risk:</b><br>“DBS-Win software was used to assess the radiographic measurements. This software is a part of the recently introduced vista scan system (Durr Dental, Germany).”(Page 871)                                                               | <b>Low risk:</b><br>“One calibrated masked examiner recorded all clinical measurements, who was not involved in the study.”(Page 872)                                                                                                                                                                            |

|               |                                                                                                                                                                                                                                                     |                                                                                    |                                                |                                                                                                                                                                                                                                                          |                                                                                                                                                                                                                      |
|---------------|-----------------------------------------------------------------------------------------------------------------------------------------------------------------------------------------------------------------------------------------------------|------------------------------------------------------------------------------------|------------------------------------------------|----------------------------------------------------------------------------------------------------------------------------------------------------------------------------------------------------------------------------------------------------------|----------------------------------------------------------------------------------------------------------------------------------------------------------------------------------------------------------------------|
| Hazari 2021   | <b>Low risk:</b><br>“The selected sites were randomly assigned to Group A or Group B by tossing a coin”(Page 152)                                                                                                                                   | <b>Low risk:</b><br>No deviation From the Intended intervention has been reported. | <b>Low risk:</b><br>No dropouts were reported. | <b>Low risk:</b><br>“these measurements the defect fill was calculated using AUTO-CAD 2010 version software.”(Page 152)                                                                                                                                  | <b>Some concerns:</b><br>No information on whether the research results were analyzed before the unblinding of the intervention outcome data.                                                                        |
| Mallappa 2022 | <b>Low risk:</b><br>“After 6–8 weeks of phase I therapy the sites were divided randomly into Group A and Group B.”(Page 361)                                                                                                                        | <b>Low risk:</b><br>No deviation From the Intended intervention has been reported. | <b>Low risk:</b><br>No dropouts were reported. | <b>Low risk:</b><br>“All the clinical parameters were assessed by JM and referee was TMG who were both blinded to the study groups.”(Page 360)                                                                                                           | <b>Low risk:</b><br>“The two investigators (DV and MJ) underwent training for the assessment of clinical parameters and radiological defect fill, defect resolution before the commencement of the study.”(Page 361) |
| Baghele 2022  | <b>Low risk:</b><br>“All the clinical parameters were assessed by JM and referee was TMG who were both blinded to the study groups. All the clinical parameters were assessed by JM and referee was TMG who were both blinded to the study groups.” | <b>Low risk:</b><br>No deviation From the Intended intervention has been reported. | <b>Low risk:</b><br>No dropouts were reported. | <b>Low risk:</b><br>“All the clinical parameters were assessed by JM and referee was TMG who were both blinded to the study groups.”<br>“All the clinical parameters were assessed by JM and referee was TMG who were both blinded to the study groups.” | <b>Some concerns:</b><br>No information on whether the research results were analyzed before the unblinding of the intervention outcome data.                                                                        |

|               |                                                                                                                                                                                          |                                                                                               |                                                           |                                                                                                                                                                                                                                                                                                                        |                                                                                                                                                                                        |
|---------------|------------------------------------------------------------------------------------------------------------------------------------------------------------------------------------------|-----------------------------------------------------------------------------------------------|-----------------------------------------------------------|------------------------------------------------------------------------------------------------------------------------------------------------------------------------------------------------------------------------------------------------------------------------------------------------------------------------|----------------------------------------------------------------------------------------------------------------------------------------------------------------------------------------|
|               | ups.”                                                                                                                                                                                    |                                                                                               |                                                           |                                                                                                                                                                                                                                                                                                                        |                                                                                                                                                                                        |
| Singhal 2022  | <p><b>Low risk:</b></p> <p>“Patients were assigned to one of the two treatment groups using a computer-generated randomization sequence.” (Page 1704)</p>                                | <p><b>Low risk:</b></p> <p>No deviation From the Intended intervention has been reported.</p> | <p><b>Low risk:</b></p> <p>No dropouts were reported.</p> | <p><b>Low risk:</b></p> <p>“clinical parameters such as Plaque index, gingival index, pocket probing depth, wound healing index, Clinical attachment level (CAL), and radiographical parameters such as vertical bone loss (VBL) &amp; depth of defect (DD) was recorded preoperatively in both groups”(Page 1704)</p> | <p><b>Some concerns:</b></p> <p>No information on whether the research results were analyzed before the unblinding of the intervention outcome data.</p>                               |
| Alshoiby 2023 | <p><b>Low risk:</b></p> <p>“Sequence generation was carried out using www.randomizer.org. Allocation was concealed in sequentially numbered opaque-sealed envelopes (MH).”(Page 345)</p> | <p><b>Low risk:</b></p> <p>No deviation From the Intended intervention has been reported.</p> | <p><b>Low risk:</b></p> <p>No dropouts were reported.</p> | <p><b>Low risk:</b></p> <p>“Two blinded experienced investigators (WA and MN) obtained all parameters. Prior to study conduction, calibration was performed through comparing two measurements by the t</p>                                                                                                            | <p><b>Low risk:</b></p> <p>“Due to the type of interventions, the operator and participants could not be blinded. The outcome assessor and the biostatistician were blinded.”(Page</p> |

|             |                                                                                                                                                        |                                                                                                  |                                                      |                                                                                                                                                                       |                                                                                                                                                                         |
|-------------|--------------------------------------------------------------------------------------------------------------------------------------------------------|--------------------------------------------------------------------------------------------------|------------------------------------------------------|-----------------------------------------------------------------------------------------------------------------------------------------------------------------------|-------------------------------------------------------------------------------------------------------------------------------------------------------------------------|
|             | 8)                                                                                                                                                     |                                                                                                  |                                                      | wo investigators o<br>n the same partici<br>pants twice, one<br>week apart”(Page<br>3459)                                                                             | 3459)                                                                                                                                                                   |
| Reçica 2023 | <b>Low risk:</b><br>“The regions tha<br>t were planned f<br>or the surgical tr<br>eatment were ra<br>ndomly determin<br>ed (left–right)”(P<br>age 246) | <b>Low risk:</b><br>No deviation<br>From the<br>Intended interv<br>ention has bee<br>n reported. | <b>Low risk:</b><br>No dropouts<br>were<br>reported. | <b>Low risk:</b><br>“periodontal pocke<br>t depth according<br>to O’Leary (PPD);<br>clinical loos attach<br>ment loss accordin<br>g to AAP 1999 (C<br>AL).”(Page 247) | <b>Some concerns:</b><br>No information<br>on whether th<br>e research resul<br>ts were analyze<br>d before the un<br>blinding of the<br>intervention out<br>come data. |

**Supplementary Table S4.** Outcome parameters of included studies.

| Mean value changes  |                     |           |                     |           |           |           |
|---------------------|---------------------|-----------|---------------------|-----------|-----------|-----------|
|                     | Periodontal probing |           | Clinical attachment |           | Bone fill |           |
|                     | depth               |           | level               |           |           |           |
| Author              | Test                | Control   | Test                | Control   | Test      | Control   |
| Bansal 2013 [19]    | 4.00±0.82           | 3.10±0.74 | 3.40±0.61           | 2.30±0.70 | 2.42±1.11 | 1.97±1.16 |
| Elgendy 2015 [20]   | 3.33±0.36           | 3.30±0.18 | 3.55±0.13           | 3.50±0.06 | NR        | NR        |
| Gamal 2016 [21]     | 2.90±0.30           | 2.70±0.31 | 1.50±0.19           | 1.70±0.40 | 1.50±0.29 | 1.50±0.21 |
| Naqvi 2017 [22]     | 2.60±2.37           | 2.65±0.82 | 3.50±1.85           | 2.65±0.82 | 4.80±1.32 | 3.50±1.43 |
| Sezgin 2017 [23]    | 4.93±1.22           | 4.21±1.21 | 4.47±1.60           | 3.27±1.34 | 2.55±1.15 | 1.98±0.80 |
| Aggour 2017 [24]    | 7.88±0.80           | 3.92±0.71 | 4.50±0.62           | 4.04±0.62 | 3.50±1.20 | 3.13±1.16 |
| Bodhare 2019 [25]   | 5.75±1.16           | 5.65±1.66 | 5.05±1.09           | 4.20±1.70 | 3.51±1.17 | 2.56±0.95 |
| Saravanan 2019 [26] | 3.93±0.63           | 2.00±0.66 | 4.93±0.93           | 2.60±0.79 | 1.24±0.11 | 0.79±0.19 |
| Atchuta 2020 [27]   | 3.60±1.42           | 3.56±1.56 | 3.40±1.65           | 3.50±1.48 | 5.35±2.05 | 5.39±2.07 |
| Goyal 2020 [28]     | 4.58±0.67           | 4.08±0.79 | 4.91±0.67           | 4.00±0.85 | 2.15±0.72 | 1.42±0.67 |
| Pavani 2021 [29]    | 4.30±0.73           | 3.45±0.34 | NR                  | NR        | 2.51±0.91 | 2.02±0.64 |
| Bahammam 2021 [30]  | 3.00±0.94           | 2.40±1.17 | 2.10±1.04           | 1.70±1.03 | 2.31±1.50 | 1.49±0.65 |
| Hazari 2021 [31]    | 2.60±0.84           | 1.50±0.53 | 1.80±0.52           | 1.50±0.84 | 2.05±0.57 | 1.95±0.46 |
| Mallappa 2022 [32]  | 3.50±1.04           | 2.20±0.66 | 3.30±1.03           | 2.10±1.28 | 3.90±0.53 | 2.70±0.59 |
| Baghele 2022 [33]   | 4.10±1.18           | 2.76±0.99 | 3.57±1.08           | 2.23±0.83 | 3.38±1.78 | 1.67±1.11 |
| Singhal 2022 [34]   | 1.58±0.74           | 1.00±0.56 | 1.92±0.45           | 0.75±0.40 | 2.33±0.32 | 2.67±0.31 |
| Alshoiby 2023 [35]  | 2.90±0.74           | 2.70±0.76 | 2.50±0.53           | 2.70±1.16 | 1.78±0.96 | 1.73±0.97 |
| Recica 2023 [36]    | 0.32±0.21           | 0.09±0.23 | 0.36±0.17           | 0.11±0.17 | NR        | NR        |

NR: not reported
